# Supplementary material for: Expression and Functional Characterization of the Agrobacterium VirB2 Amino Acid Substitution Variants in T-pilus Biogenesis, Virulence, and Transient Transformation Efficiency
Source: PubMed Central journal article supplement (PMC4074166; doi:10.1371/journal.pone.0101142), 2014-06-27
Supplement: pone.0101142.s006.pdf [file pone.0101142.s006.pdf]

**Table S1 Amino acid sequence homology analysis of selected VirB2 family proteins.**

| Protein <sup>a</sup><br>name | <i>A. t.</i> C58<br>pTiC58<br>VirB2 | <i>A. r.</i><br>pRi1724<br>Riorf154 | <i>A. t.</i><br>pTiA6<br>VirB2 | <i>A. v.</i> S4<br>pTiS4<br>VirB2 | <i>R. e.</i><br>CFN42<br>p42a<br>VirB2a | <i>S. m.</i><br>WSM419<br>pSMED02<br>VirB2 | <i>M. c. bv.</i><br><i>biserrulae</i><br>TrbC | <i>A. r.</i><br>K84<br>AvhB2 | <i>A. t.</i> C58<br>pAtC58<br>AvhB2 | <i>R. e.</i><br>CFN42<br>p42d<br>VirB2 | <i>S. m.</i><br>1021<br>pSymA<br>VirB2 |
|------------------------------|-------------------------------------|-------------------------------------|--------------------------------|-----------------------------------|-----------------------------------------|--------------------------------------------|-----------------------------------------------|------------------------------|-------------------------------------|----------------------------------------|----------------------------------------|
| VirB2p <sup>b</sup>          | 100 (100)                           | 75 (81)                             | 90 (95)                        | 74 (82)                           | 93 (98)                                 | 69 (76)                                    | 71 (77)                                       | 40 (56)                      | 36 (56)                             | 35 (56)                                | 35 (50)                                |
| VirB2m <sup>c</sup>          | 100 (100)                           | 96 (96)                             | 99 (100)                       | 96 (96)                           | 95 (100)                                | 93 (94)                                    | 91 (92)                                       | 44 (61)                      | 35 (55)                             | 38 (57)                                | 35 (59)                                |

<sup>a</sup>: Organism full name and protein UniProt accession number: *Agrobacterium tumefaciens* pTiC58, P17792; *Agrobacterium rhizogenes* pRi1724, Q9F5A1; *Agrobacterium tumefaciens* pTiA6, P05351; *Agrobacterium vitis* pTiS4, B9K417; *Rhizobium etli* p42a, Q2K2L1; *Sinorhizobium medicae* pSMED02; A6UMA7, *Mesorhizobium ciceri* chromosome, E8TGI0; *Agrobacterium radiobacter* K84 chromosome, B9JE70; *Agrobacterium tumefaciens* pAtC58, Q7D3S1; *Rhizobium etli* p42d, Q8KIM6; *Sinorhizobium meliloti* pSymA, Q92YZ4.

<sup>b</sup> identity % (similarity %) of full-length pTiC58 VirB2 against other VirB2 homologs.

<sup>c</sup> identity % (similarity %) of processed pTiC58 VirB2 against other VirB2 homologs.
