# Supplementary material for: Expression and Functional Characterization of the Agrobacterium VirB2 Amino Acid Substitution Variants in T-pilus Biogenesis, Virulence, and Transient Transformation Efficiency
Source: PubMed Central journal article supplement (PMC4074166; doi:10.1371/journal.pone.0101142), 2014-06-27
Supplement: pone.0101142.s008.pdf [file pone.0101142.s008.pdf]

**Table S3 primer list**

| Primer name           | Sequence(5'→3')                | Related information                                                  |
|-----------------------|--------------------------------|----------------------------------------------------------------------|
| VirBp-B1-SpeI-F       | CCCCTAGTCACTTTCCAGCGATGACATGA  | Universal primers of pRL4 and single amino acid substitution mutants |
| VirB3-XhoI-R          | TCTCCTCGAGTTACGCCATTCTCTCCCT   |                                                                      |
| VirB2-up-SacI-sense   | TTAAGAGCTCGCAGAACCAGGCTCAAGC   | Generate <i>virB2</i> -up fragment for pJQ- <i>virB2</i>             |
| VirB2-up-SpeI-anti    | TCTACTAGTGCATCGCATTATTGCGGACCT |                                                                      |
| VirB2-down-SpeI-sense | TAATACTAGTGGCAAACGCTGACTGGAGG  | Generate <i>virB2</i> -down fragment for pJQ- <i>virB2</i>           |
| VirB2-down-XhoI-anti  | TAAGCTCGAGGTCATTGCGAAGGAGTTT   |                                                                      |
| VirB2-P44A-Sense      | GCATTTTCTCCTCTGGGGCAGCCGC      | Generate VirB2-P44A                                                  |
| VirB2-P44A-Anti       | GCGGCTGCCCCAGAGGAGAAAATGC      |                                                                      |
| VirB2-A45V-Sense      | GCCGGTTGCGGCCCAATCTGCAGGT      | Generate VirB2-A45V                                                  |
| VirB2-A45V- Anti      | ACCTGCAGATTGGGCCGCAACCGGC      |                                                                      |
| VirB2-A47V-Sense      | GCGGTCCAATCTGCAGGTGGCG         | Generate VirB2-A47V                                                  |
| VirB2-A47V- Anti      | CGCCACCTGCAGATTGGACCGC         |                                                                      |
| VirB2-S49A-Sense      | GCCCAAGCAGCAGGTGGCGGCACTG      | Generate VirB2-S49A                                                  |
| VirB2-S49A- Anti      | CAGTGCCGCCACCTGCTGCTTGGGC      |                                                                      |
| VirB2-G51A-Sense      | CCAATCTGCAGCTGGCGGCACTGAC      | Generate VirB2-G51A                                                  |
| VirB2-G51A- Anti      | GTCAGTGCCGCCAGCTGCAGATTGG      |                                                                      |
| VirB2-D55A-Sense      | TGGCGGCACTGCCCCAGCCACAATG      | Generate VirB2-D55A                                                  |
| VirB2-D55A- Anti      | CATTGTGGCTGGGGCAGTGCCGCCA      |                                                                      |
| VirB2-P56A-Sense      | GGCACTGACGCCGCCACAATGGTTA      | Generate VirB2-P56A                                                  |
| VirB2-P56A- Anti      | TAACCATTGTGGCGGCGTCAGTGCC      |                                                                      |
| VirB2-I63A-Sense      | ACAATGGTTAACAACGCATGCACGTTTATC | Generate VirB2-I63A                                                  |
| VirB2-I63A- Anti      | GATAAACGTGCATGCGTTGTTAACCATTGT |                                                                      |
| VirB2-C64A-Sense      | TTAACAACATAGCCACGTTTATCCT      | Generate VirB2-C64A                                                  |
| VirB2-C64A-anti       | AGGATAAACGTGGCTATGTTGTTAA      |                                                                      |
| VirB2-I67A-Sense      | TATGCACGTTTGCCCTTGGTCCGTT      | Generate VirB2-I67A                                                  |
| VirB2-I67A- Anti      | AACGGACCAAGGGCAAACGTGCATA      |                                                                      |
| VirB2-G69A-Sense      | CGTTTATCCTTGCTCCGTTCCGGCCA     | Generate VirB2-G69A                                                  |
| VirB2-G69A- Anti      | TGGCCGAACGGAGCAAGGATAAACG      |                                                                      |

|                   |                               |             |
|-------------------|-------------------------------|-------------|
| VirB2-P70A-Sense  | TTATCCTTGGTGCCTTCGGCCAGTC     | Generate    |
| VirB2-P70A- Anti  | GACTGGCCGAAGGCACCAAGGATAA     | VirB2-P70A  |
| VirB2-F71A-Sense  | TCCTTGGTCCGGCTGGCCAGTCACT     | Generate    |
| VirB2-F71A- Anti  | AGTGACTGGCCAGCCGGACCAAGGA     | VirB2-F71A  |
| VirB2-G72A-Sense  | TTGGTCCGTTCGCCAGTCACTCGC      | Generate    |
| VirB2-G72A- Anti  | GCGAGTGAAGTGGGCGAACGGACCAA    | VirB2-G72A  |
| VirB2-Q73A-Sense  | GTCCGTTCCGGCGCATCACTCGCTGTT   | Generate    |
| VirB2-Q73A- Anti  | AACAGCGAGTGATGCGCCGAACGGAC    | VirB2-Q73A  |
| VirB2-L78A-Sense  | CACTCGCTGTTGCTGGCATCGTGGC     | Generate    |
| VirB2-L78A- Anti  | GCCACGATGCCAGCAACAGCGAGTG     | VirB2-L78A  |
| VirB2-I80A-Sense  | CGCTGTTCTTGGCGCTGTGGCCATCGGAA | Generate    |
| VirB2-I80A- Anti  | TTCCGATGGCCACAGCGCCAAGAACAGCG | VirB2-I80A  |
| VirB2-I85A-Sense  | GCCATCGGAGCCTCCTGGATGTTTCG    | Generate    |
| VirB2-I85A- Anti  | CGAACATCCAGGAGGCTCCGATGGC     | VirB2-I85A  |
| VirB2-W87A-Sense  | TCGGAATCTCCGCCATGTTCCGGTCG    | Generate    |
| VirB2-W87A- Anti  | CGACCGAACATGGCGGAGATTCCGA     | VirB2-W87A  |
| VirB2-M88A-Sense  | CGGAATCTCCTGGGCTTTCGGTCCG     | Generate    |
| VirB2-M88A- Anti  | GCGACCGAAAGCCCAGGAGATTCCG     | VirB2-M88A  |
| VirB2-F89A-Sense  | AATCTCCTGGATGGCCGGTCCGCGCT    | Generate    |
| VirB2-F89A- Anti  | AGCGCGACCGGCCATCCAGGAGATT     | VirB2-F89A  |
| VirB2-R91A-Sense  | CTGGATGTTCCGGTGTCTTCACTCGGT   | Generate    |
| VirB2-R91A- Anti  | ACCGAGTGAAGCAGCACCGAACATCCAG  | VirB2-R91A  |
| VirB2-L94A-Sense  | GTCGCGCTTCCAGCCGGTCTCGTTGC    | Generate    |
| VirB2-L94A- Anti  | GCAACGAGACCGGCTGAAGCGCGAC     | VirB2-L94A  |
| VirB2-V100A-Sense | TCGTTGCCGGCGCAGTCGGCGGCAT     | Generate    |
| VirB2-V100A- Anti | ATGCCGCCGACTGCGCCGGCAACGA     | VirB2-V100A |
| VirB2-G103A-Sense | GCGTCGTCCGGCGCTATTGTCATCAT    | Generate    |
| VirB2-G103A- Anti | ATGATGACAATAGCGCCGACGACGC     | VirB2-G103A |
| VirB2-I104A-Sense | TCGTCCGGCGGCGCTGTCATCATGTT    | Generate    |
| VirB2-I104A- Anti | AACATGATGACAGCGCCGCCGACGA     | VirB2-I104A |
| VirB2-M107A-Sense | GGCATTGTCATCGCTTTTGGAGCCAGC   | Generate    |
| VirB2-M107A- Anti | GCTGGCTCCAAAAGCGATGACAATGCC   | VirB2-M107A |
| VirB2-F108A-Sense | ATTGTCATCATGGCTGGAGCCAGCTTCC  | Generate    |
| VirB2-F108A- Anti | GGAAGCTGGCTCCAGCCATGATGACAAT  | VirB2-F108A |
| VirB2-A110G-Sense | TCATGTTTGGAGGCAGCTTCTGGG      | Generate    |
| VirB2-A110G- Anti | CCCAGGAAGCTGCCTCCAAACATGA     | VirB2-A110G |
| VirB2-L113A-Sense | GAGCCAGCTTCGCAGGCAAAACGCT     | Generate    |

|                   |                              |             |
|-------------------|------------------------------|-------------|
| VirB2-L113A- Anti | AGCGTTTTGCCTGCGAAGCTGGCTC    | VirB2-L113A |
| VirB2-K115A-Sense | GCTTCCTGGGCGCAACGCTGACTGG    | Generate    |
| VirB2-K115A- Anti | CCAGTCAGCGTTGCGCCCAGGAAGC    | VirB2-K115A |
| VirB2-G119A-Sense | CAAAACGCTGACTGCTGGTGGCTAATGA | Generate    |
| VirB2-G119A- Anti | TCATTAGCCACCAGCAGTCAGCGTTTTG | VirB2-G119A |
| VirB2-G119C-Sense | CAAAACGCTGACTTGCGGTGGCTAATGA | Generate    |
| VirB2-G119C- Anti | TCATTAGCCACCGCAAGTCAGCGTTTTG | VirB2-G119C |
| VirB2-G120A-Sense | ACGCTGACTGGAGCTGGCTAATGAATGA | Generate    |
| VirB2-G120A- Anti | TCATTCATTAGCCAGCTCCAGTCAGCGT | VirB2-G120A |
| VirB2-G121A-Sense | CTGACTGGAGGTGCTTAATGAATGATCG | Generate    |
| VirB2-G121A- Anti | CGATCATTCATTAAGCACCTCCAGTCAG | VirB2-G121A |
