# Supplementary material for: Expression and Functional Characterization of the Agrobacterium VirB2 Amino Acid Substitution Variants in T-pilus Biogenesis, Virulence, and Transient Transformation Efficiency
Source: PubMed Central journal article supplement (PMC4074166; doi:10.1371/journal.pone.0101142), 2014-06-27
Supplement: pone.0101142.s009.pdf [file pone.0101142.s009.pdf]

**Table S4 Phenotype comparisons of pTiC58 and pTiA6 VirB2 variants**

| Amino acid residue | Substitution | Ti-plasmid | Extracellular VirB2 <sup>a</sup> | Virulence <sup>b</sup> |
|--------------------|--------------|------------|----------------------------------|------------------------|
| G51                | A            | C58        | +++                              | +++                    |
|                    | C            | A6         | -                                | -                      |
| C64                | A            | C58        | +++                              | +++                    |
|                    | C            | A6         | +++                              | +++                    |
| I67                | A            | C58        | +++                              | +++                    |
|                    | C            | A6         | +++                              | +++                    |
| F71                | A            | C58        | -                                | -                      |
|                    | C            | A6         | +                                | -                      |
| I85                | A            | C58        | -                                | +++                    |
|                    | C            | A6         | +++                              | +++                    |
| M88                | A            | C58        | -                                | -                      |
|                    | C            | A6         | ++                               | ++                     |
| L94                | A            | C58        | -                                | +++                    |
|                    | C            | A6         | +++                              | ++                     |
| I104               | A            | C58        | +++                              | +++                    |
|                    | C            | A6         | +++                              | +++                    |
| M107               | A            | C58        | -                                | +++                    |
|                    | C            | A6         | +++                              | +++                    |
| G119               | A            | C58        | +                                | +++                    |
|                    | C            | C58        | +                                | +                      |
|                    | C            | A6         | +++                              | -                      |

The levels of extracellular VirB2 production<sup>a</sup> and occurrence or size of tumor formation on tomato stems<sup>b</sup> were based on results from Figure 2, 4, and S5A in this study and previous study by Kerr and Christie (2010) [1]. The levels of extracellular VirB2 and virulence strength are indicated with wild type (+++), modest reduction (++), highly attenuation (+), or loss (-).

### Reference

1. Kerr JE, Christie PJ (2010) Evidence for VirB4-Mediated Dislocation of Membrane-Integrated VirB2 Pilin During Biogenesis of the *Agrobacterium* VirB/VirD4 Type IV Secretion System. *J Bacteriol.* 192: 4923-34.
